# Supplementary material
Source: Research Square preprint supplement (doi:10.21203/rs.3.rs-9787195/v1)
Supplement: Supplementary file 1 [file c1250bb0177b51d0c7dcc49b.docx]

**Supplementary File 1: Semi-Structured Interview Guide**

**Opening and Informed Consent**

1.Introduce myself, explain the purpose, content, and expected duration of the interview.

2.Emphasize voluntary participation, confidentiality, and obtain consent for audio recording.

3.Ask the participant to briefly introduce their basic information (e.g., age, grade, major, etc.).

**Core Questions: Students’ Real Experiences and Coping Strategies When Encountering People Living with HIV**

4.When you hear the words “HIV”/“AIDS”, what first comes to your mind? How much do you know about this disease, for example, its transmission routes, mortality rate, and impact on quality of life?

5.If you were to come into contact with a person living with HIV, what would you fear the most? Are there any differences between daily life and work/study settings? Could you describe a specific moment or situation that impressed you the most and made you feel particularly afraid?

6.Would you be willing to share a classroom with a person living with HIV? Why or why not?

7.Suppose you go out for a meal with a group, and afterwards you are told that one of the people dining with you is living with HIV. What thoughts would you have? Would you feel fear? When you feel afraid or anxious about contact with a person living with HIV, how do you usually regulate and cope with those feelings? Do you talk about your fear with others? Does their support help you? Have you ever sought information support or psychological counseling? How effective was it? If you knew that the person is regularly taking medication and has a consistently undetectable viral load (meaning they are not infectious for HIV), what would you think? Would you still feel fear? How would you respond?

8.If one of your friends was living with HIV, what would you think? Would you feel fear? How would you respond? Do you think your friend would hide their status from you? What would you think, and what would you do?

9.What do you think about the statement “HIV infection is the result of personal misconduct”? Do you think there is discrimination against people living with HIV in our society? Do you think such a social environment increases or decreases your fear of HIV?

10.Compared to the past, have your views changed? What has caused such changes?

11.Have you ever had sex? Have you ever engaged in high-risk sexual behaviors (e.g., not using a condom, or same-sex contact)? In those situations, did you think about HIV? Did you have any fear of HIV?

12.Have you ever actively taken an HIV test? If you have not been tested, what are the main reasons? If you have been tested, what prompted you to do so?

13.If you yourself were living with HIV, would you hide your status? What would your thoughts be?

14.If a curative treatment for HIV became available, would you still feel fear? Would it change your views?

15.Regarding the topic of college students’ fear of HIV/AIDS, is there anything you think is very important that I have not asked? Or is there anything else you would like to share, such as your views or experiences?

**Closing**

16.Thank the participant again for their time and honest sharing.

17.Inform them that a brief follow-up contact may be made if needed for clarification.
